# Supplementary material for: Epigenomics and transcriptomics of systemic sclerosis CD4+ T cells reveal long-range dysregulation of key inflammatory pathways mediated by disease-associated susceptibility loci
Source: PubMed Central journal article supplement (PMC7519528; doi:10.1186/s13073-020-00779-6), 2020-09-25
Supplement: 13073_2020_779_MOESM1_ESM.pdf [file 13073_2020_779_MOESM1_ESM.pdf]

**Table S1.** Clinical characteristics of cohort

|                                        | SSc (N = 48) |         | Controls (N = 16) |         | P-value |
|----------------------------------------|--------------|---------|-------------------|---------|---------|
|                                        | Mean or %    | SD or N | Mean or %         | SD or N |         |
| Age (years)                            | 53.2         | 14.3    | 53.6              | 14.8    | 0.926   |
| Female                                 | 91.7 %       | 44      | 75 %              | 12      | 0.081   |
| Skin disease                           |              |         |                   |         |         |
| Sine Scleroderma (ssSSc)               | 18.7 %       | 9       |                   |         |         |
| Limited (lcSSc)                        | 41.7 %       | 20      |                   |         |         |
| Diffuse (dcSSc)                        | 31.3 %       | 15      |                   |         |         |
| Early (eSSc)                           | 8.3 %        | 4       |                   |         |         |
| Smoking                                |              |         |                   |         |         |
| Current                                | 12.5 %       | 6       |                   |         |         |
| Past                                   | 27.1 %       | 13      |                   |         |         |
| Never                                  | 39.6 %       | 19      |                   |         |         |
| Lung disease                           |              |         |                   |         |         |
| None                                   | 47.9 %       | 23      |                   |         |         |
| Interstitial lung disease              | 37.5 %       | 18      |                   |         |         |
| Pulmonary hypertension                 | 14.6 %       | 7       |                   |         |         |
| Immunosuppressive medication           | 43.8 %       | 21      |                   |         |         |
| Disease duration (years)               | 15.4         | 11.7    |                   |         |         |
| Raynaud's phenomenon                   | 97.9 %       | 47      |                   |         |         |
| Digital ulcers                         | 50 %         | 24      |                   |         |         |
| Telangiectasias                        | 77.1 %       | 37      |                   |         |         |
| Esophageal hypomotility                | 85.4 %       | 41      |                   |         |         |
| Scleroderma renal crisis               | 4.2 %        | 2       |                   |         |         |
| Tendinopathy                           | 16.7 %       | 8       |                   |         |         |
| Arthritis                              | 14.6 %       | 7       |                   |         |         |
| Myositis                               | 18.8 %       | 9       |                   |         |         |
| Calcinosis                             | 29.2 %       | 14      |                   |         |         |
| Anti-nuclear antibodies                |              |         |                   |         |         |
| Anti-centromere                        | 22.9 %       | 11      |                   |         |         |
| Anti-topoisomerase I                   | 20.8 %       | 10      |                   |         |         |
| Anti-RNA polymerase III                | 12.5 %       | 6       |                   |         |         |
| Anti-PM/Scl                            | 10.4 %       | 5       |                   |         |         |
| Immunosuppressive therapy <sup>a</sup> | 43.8 %       | 21      |                   |         |         |
| Vasodilator therapy <sup>b</sup>       | 29.2 %       | 14      |                   |         |         |

<sup>a</sup>Corticotherapy, azathioprine, mycophenolic acid, methotrexate, cyclophosphamide or rituximab.

<sup>b</sup>Antiendothelin receptor antagonist, prostanoids or phosphodiesterase-5 inhibitors
